# Supplementary material for: Iron Sulfide Microspheres Supported on Cellulose-Carbon Nanotube Conductive Flexible Film as an Electrode Material for Aqueous-Based Symmetric Supercapacitors with High Voltage
Source: PubMed Central journal article supplement (PMC11191093; doi:10.1021/acsomega.4c03232), 2024-06-06
Supplement: ao4c03232_si_001.pdf [file ao4c03232_si_001.pdf]

## Supporting Information

### **Iron sulfide microspheres supported on cellulose-carbon nanotube conductive flexible film as an electrode material for aqueous-based symmetric supercapacitors with high voltage**

Jincy Parayangattil Jyothibasua, You-Ching Tien<sup>a</sup>, Zi-Ting Chen<sup>a</sup>, Hongta Yang<sup>a</sup>, Tzu  
Hsuan Chiang<sup>b</sup>, Ahmed F.M. EL-Mahdy<sup>c</sup>, and Rong-Ho Lee<sup>\*a,d</sup>

<sup>a</sup> Department of Chemical Engineering, National Chung Hsing University, Taichung, 402, Taiwan

<sup>b</sup> Department of Energy Engineering, National United University, Miaoli, 360302, Taiwan.

<sup>c</sup> Department of Materials and Optoelectronic Science, National Sun Yat-Sen University, Kaohsiung, 80424, Taiwan

<sup>d</sup> Department of Chemical Engineering and Materials Science, Yuan Ze University, Taoyuan City 320, Taiwan

\* To whom all correspondence should be addressed.

Tel.: 886-4-22854308; Fax: 886-4-22854734

E-mail: rhl@nchu.edu.tw

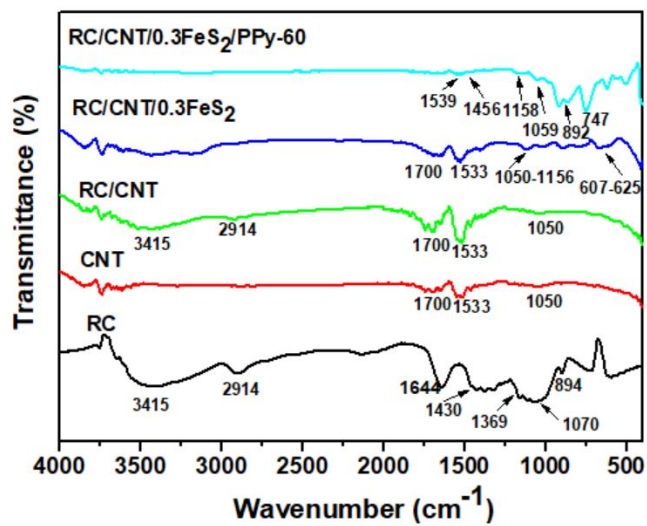

Figure S1. FTIR spectra of RC, CNT, RC/CNT, RC/CNT/0.3FeS<sub>2</sub>, and RC/CNT/0.3FeS<sub>2</sub>/PPy-60 composite films.

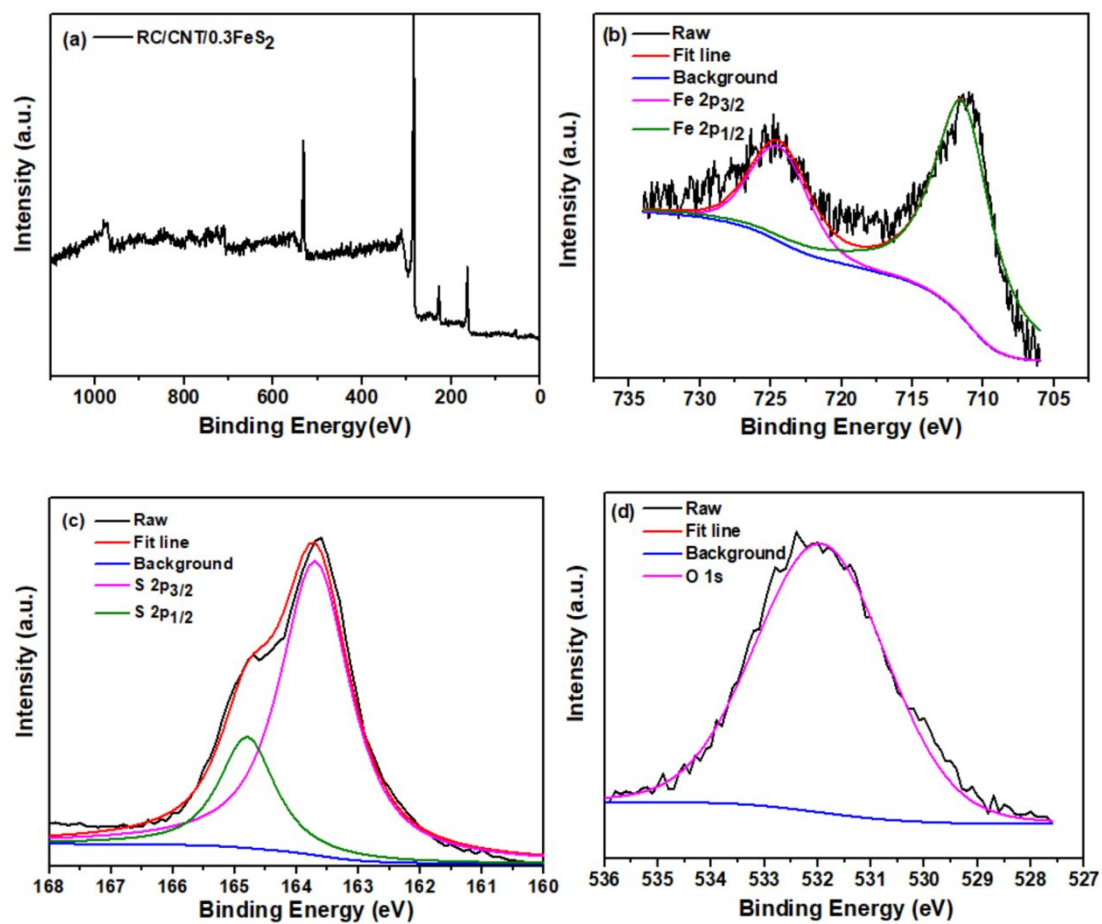

Figure S2. (a) XPS survey spectrum of RC/CNT/0.3FeS<sub>2</sub> composite film. XPS spectra (b) Fe 2p, (c) S 2p, and (d) O 1s binding energies of RC/CNT/0.3FeS<sub>2</sub> composite film.

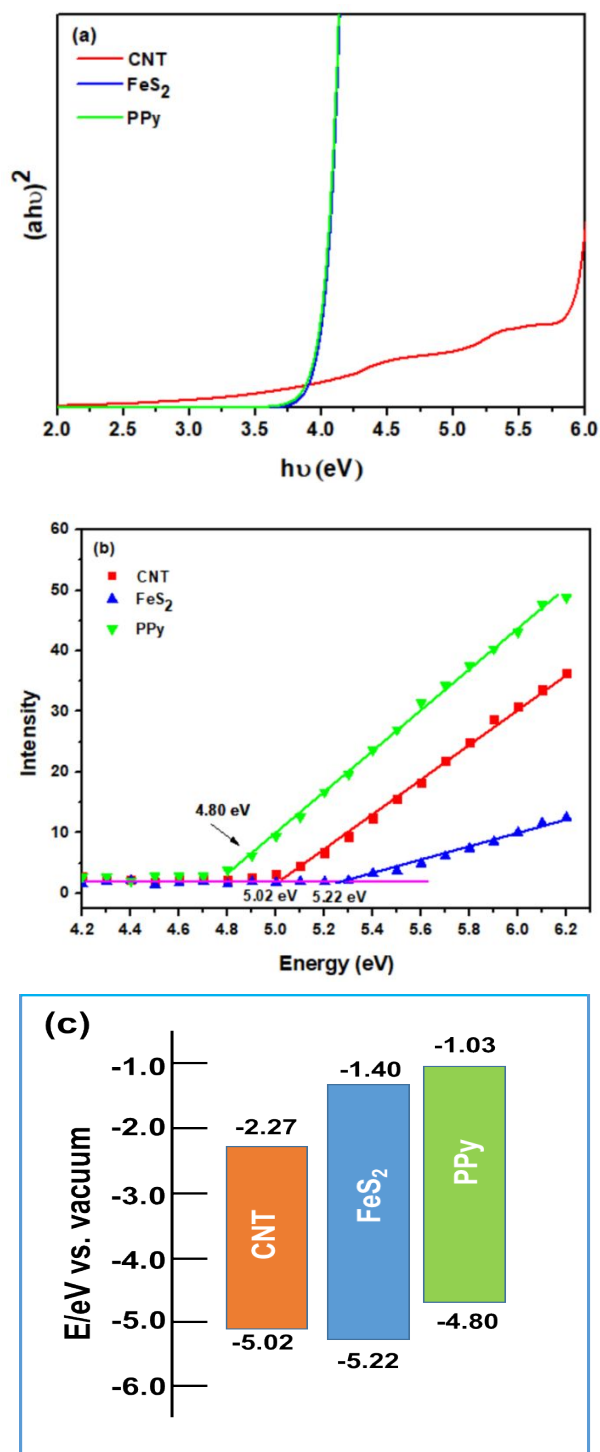

Figure S3. The tauc-plots, AC-2 low energy photoelectron spectra, and energy diagram of the CNT, FeS<sub>2</sub>, and PPy materials.

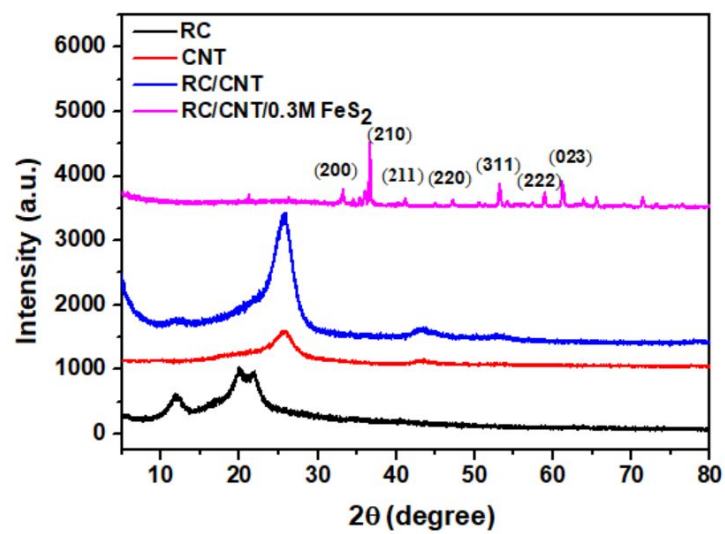

Figure S4. XRD patterns of RC, CNT, RC/CNT, and RC/CNT/0.3FeS<sub>2</sub> composite films.

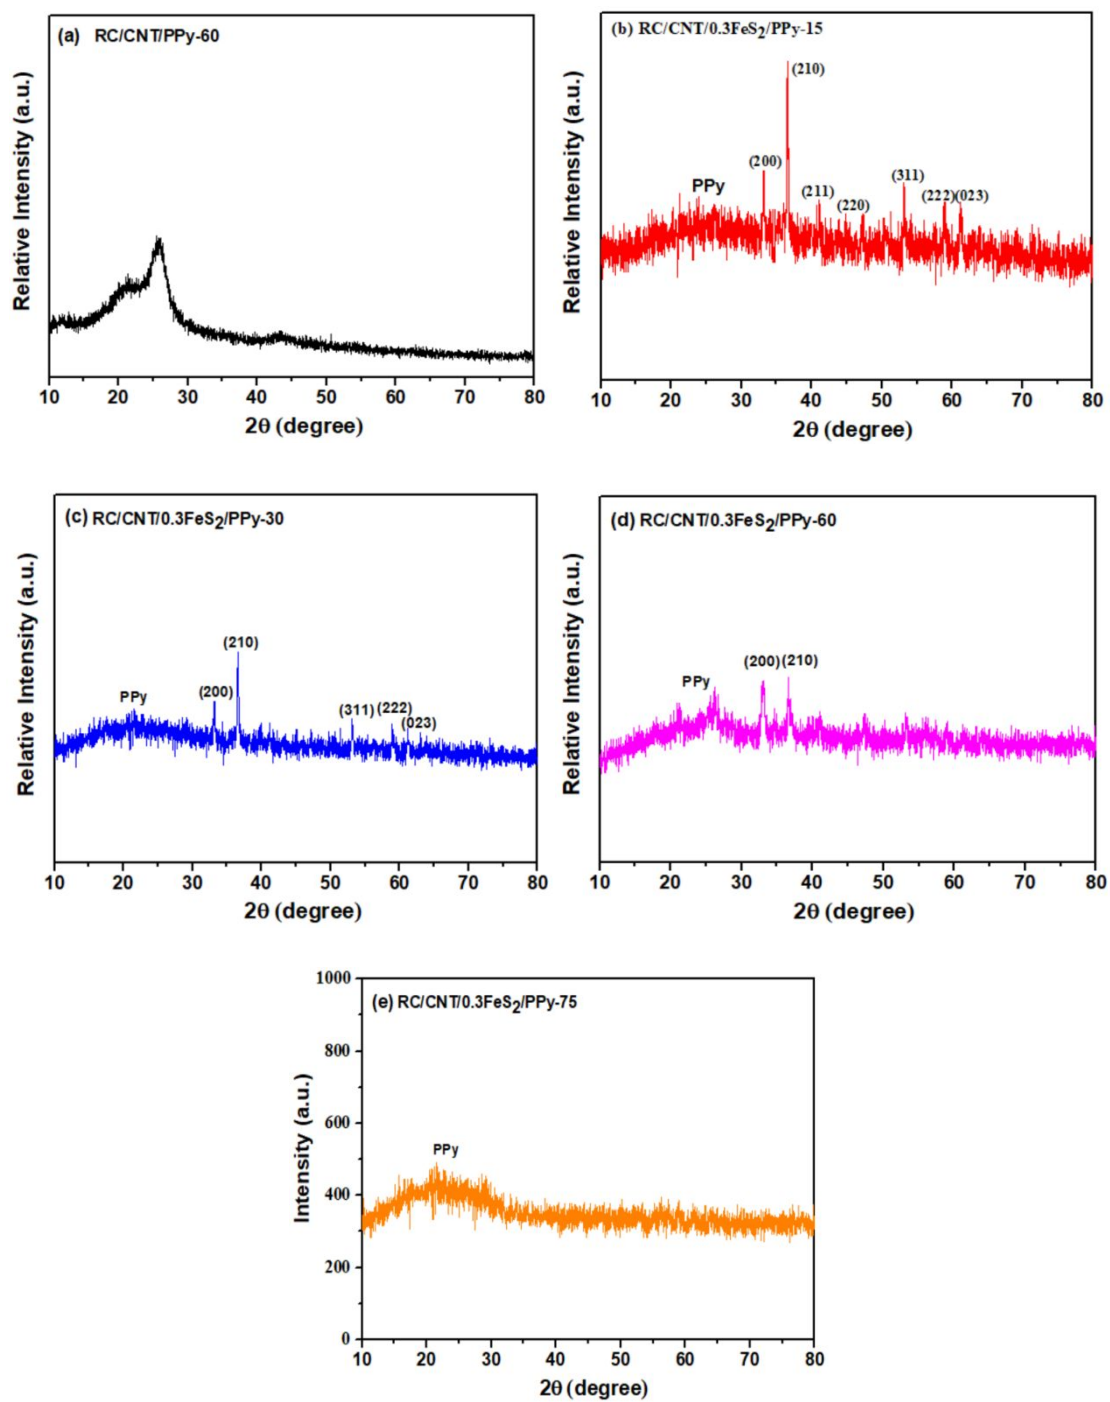

Figure S5. XRD patterns of RC/CNT/PPy-60, RC/CNT/0.3FeS<sub>2</sub>/PPy-15, RC/CNT/0.3FeS<sub>2</sub>/PPy-30, RC/CNT/0.3FeS<sub>2</sub>/PPy-60, and RC/CNT/0.3FeS<sub>2</sub>/PPy-75 composites.

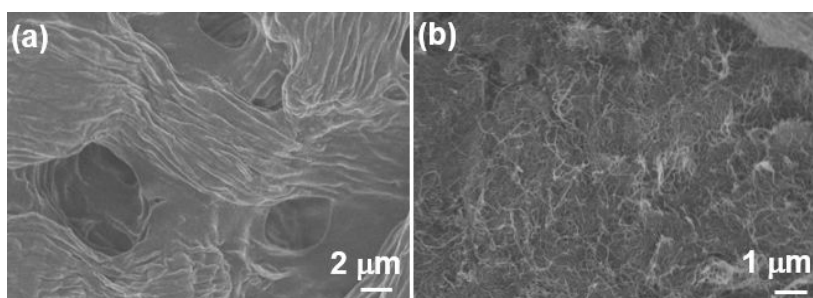

Figure S6. SEM images of (a) RC and (b) RC/CNT films.

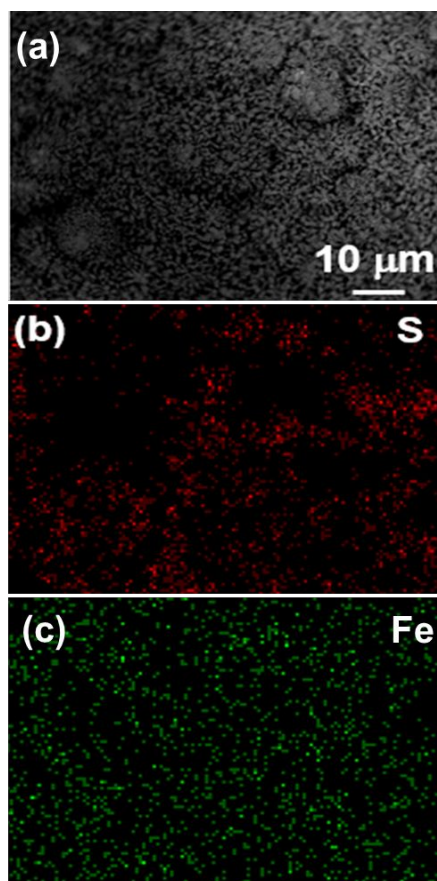

Figures S7. (a) SEM and ((b),(c)) EDX images of the (b) S, and (c) Fe elements in the RC/CNT/0.3FeS<sub>2</sub> composite.

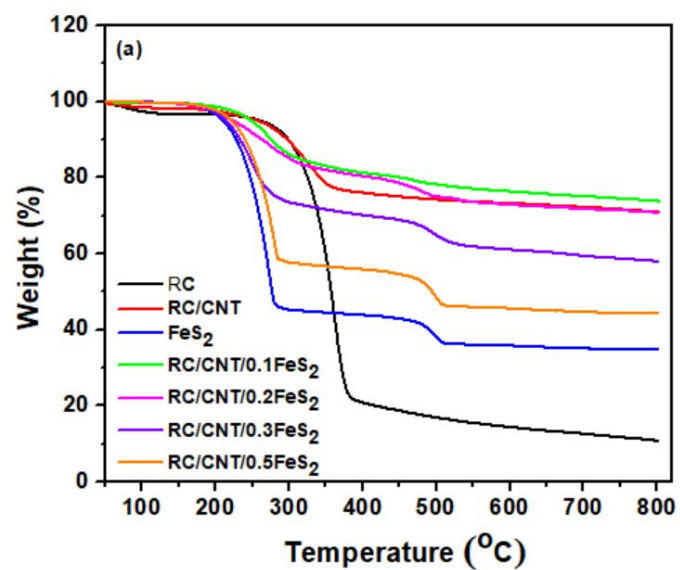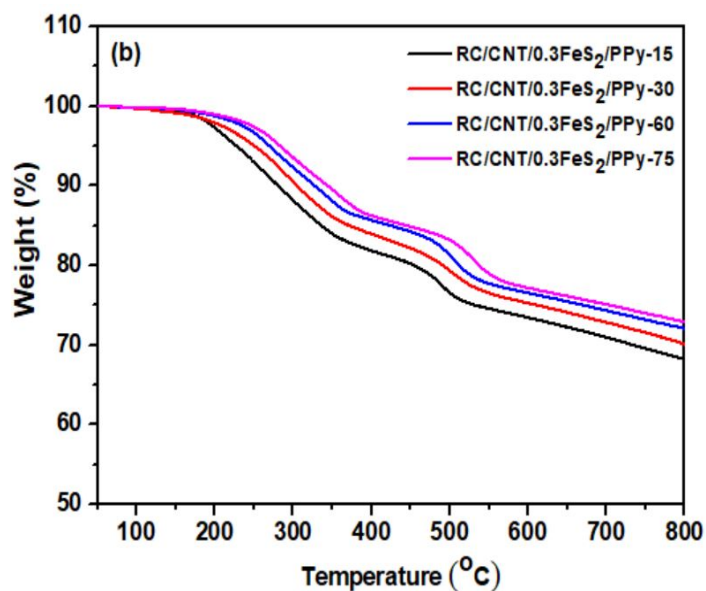

**Figure S8.** TGA curves of (a) RC, RC/CNT, FeS<sub>2</sub>, RC/CNT/0.1FeS<sub>2</sub>, RC/CNT/0.2FeS<sub>2</sub>, RC/CNT/0.3FeS<sub>2</sub>, and RC/CNT/0.5FeS<sub>2</sub>; (b) RC/CNT/0.3FeS<sub>2</sub>/PPy-15, RC/CNT/0.3FeS<sub>2</sub>/PPy-30, RC/CNT/0.3FeS<sub>2</sub>/PPy-60, and RC/CNT/0.3FeS<sub>2</sub>/PPy-75 composites.



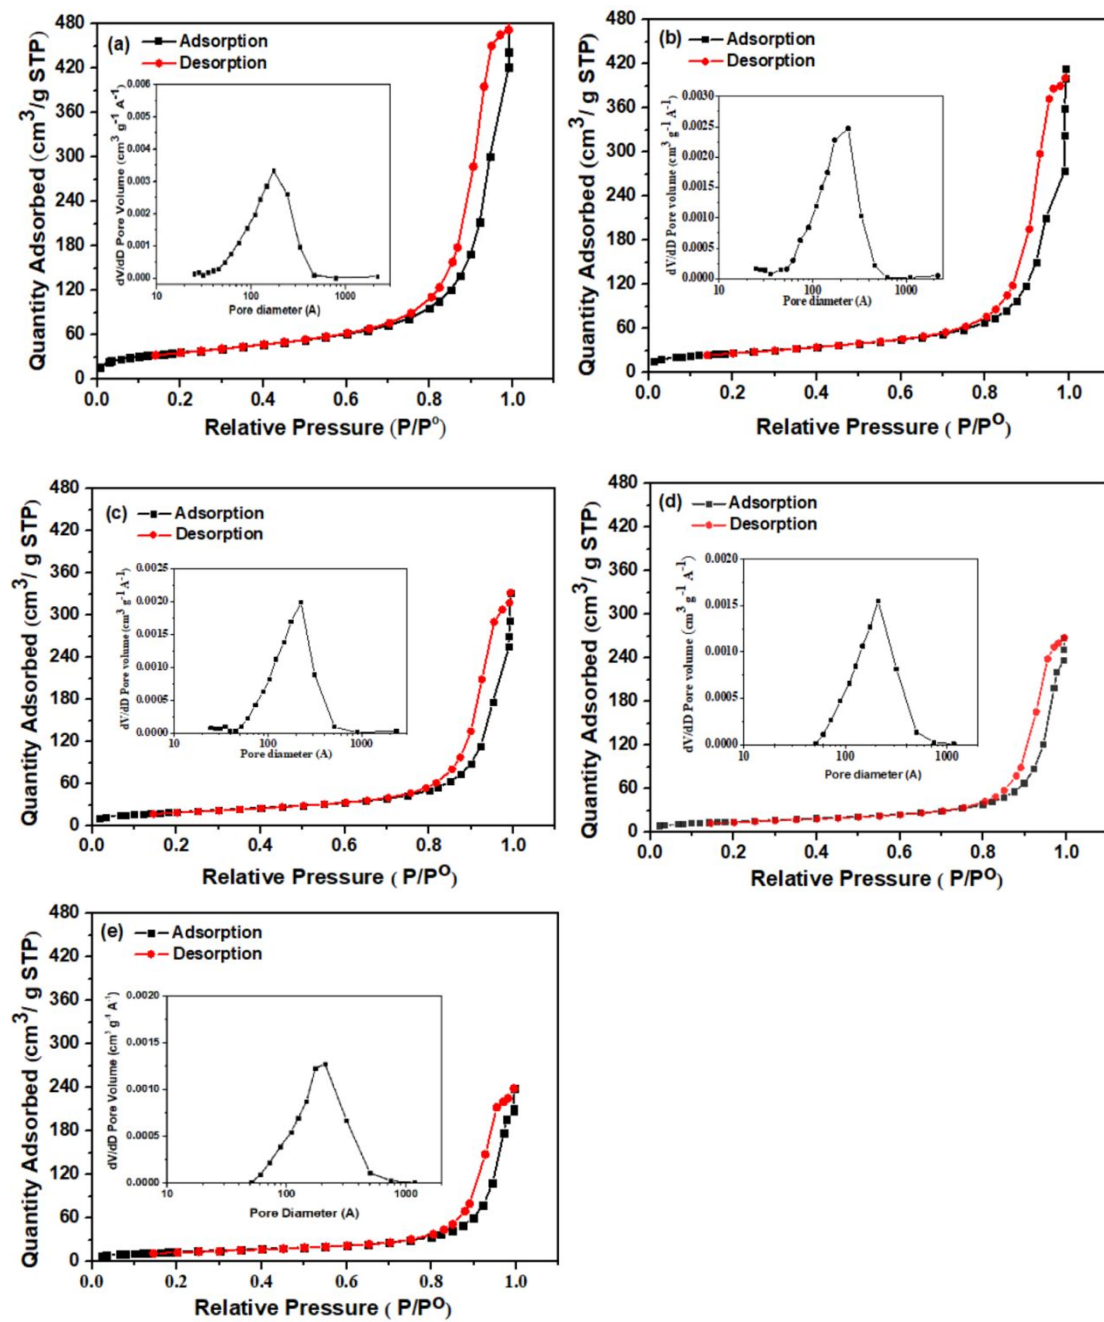

**Figure S9.**  $N_2$  adsorption-desorption isotherms and pore size distributions of (a) RC/CNT, (b) RC/CNT/0.1FeS<sub>2</sub>, (c) RC/CNT/0.2FeS<sub>2</sub>, (d) RC/CNT/0.3FeS<sub>2</sub>, and (e) RC/CNT/0.5FeS<sub>2</sub> composites films.

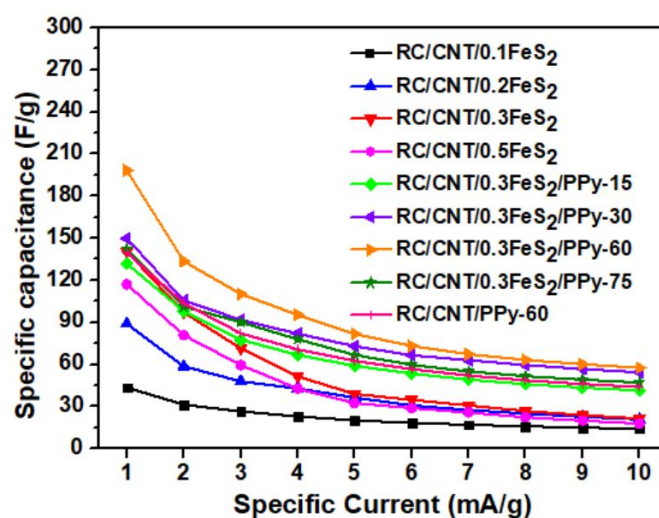

**Figure S10.** Specific capacitances of the RC/CNT/0.1FeS<sub>2</sub>, RC/CNT/0.2FeS<sub>2</sub>, RC/CNT/0.3FeS<sub>2</sub>, RC/CNT/0.5FeS<sub>2</sub>, RC/CNT/0.3FeS<sub>2</sub>/PPy-15, RC/CNT/0.3FeS<sub>2</sub>/PPy-30, RC/CNT/0.3FeS<sub>2</sub>/PPy-60, RC/CNT/0.3FeS<sub>2</sub>/PPy-75, and RC/CNT/PPy-60 composites plotted with respect to the specific current.

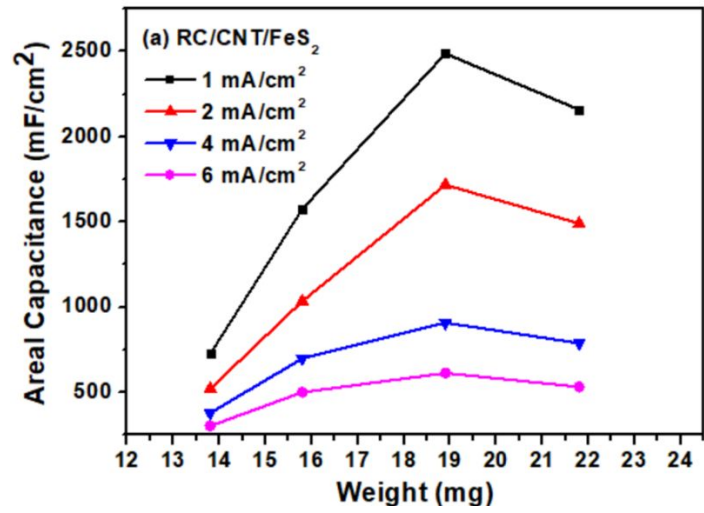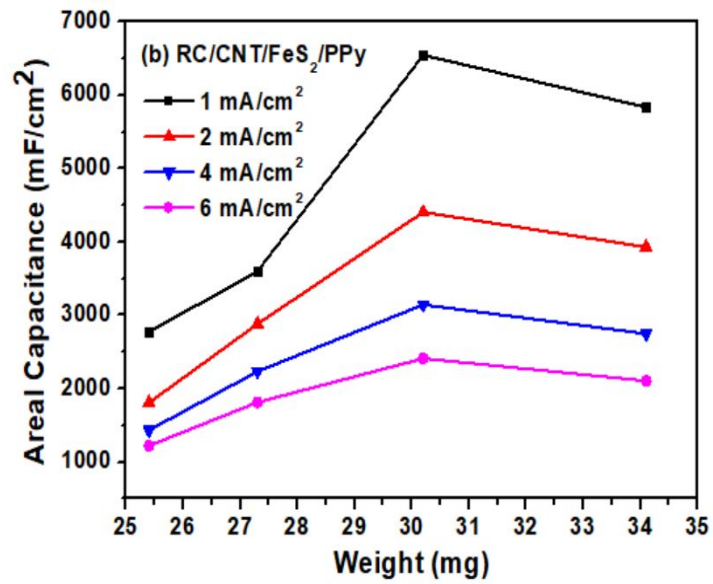

Figure S11. The areal capacitance values plotted against the weight of the RC/CNT/FeS<sub>2</sub> and RC/CNT/FeS<sub>2</sub>/PPy electrodes.

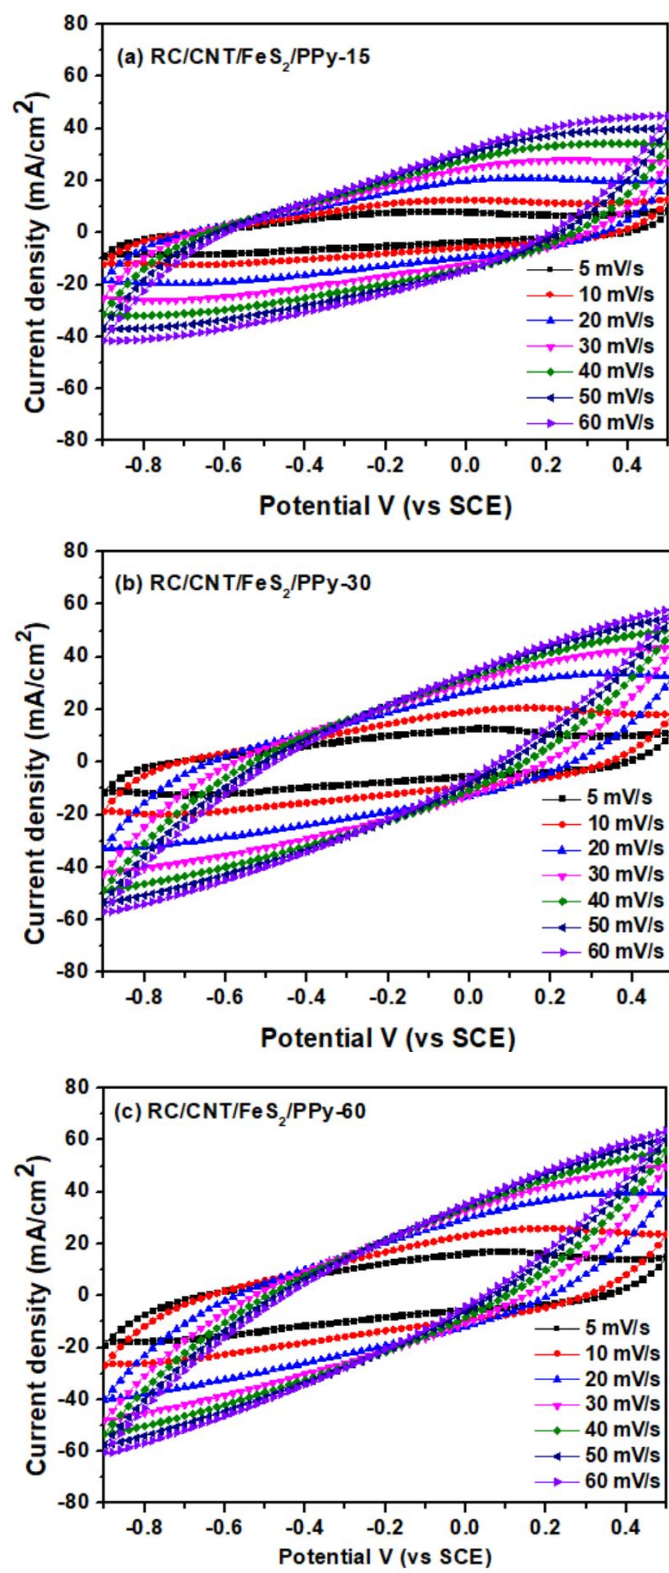

Figure S12. CV plots at different scan rates of (a) RC/CNT/FeS<sub>2</sub>/PPy-15, (b) RC/CNT/FeS<sub>2</sub>/PPy-30, and (c) RC/CNT/FeS<sub>2</sub>/PPy-60.

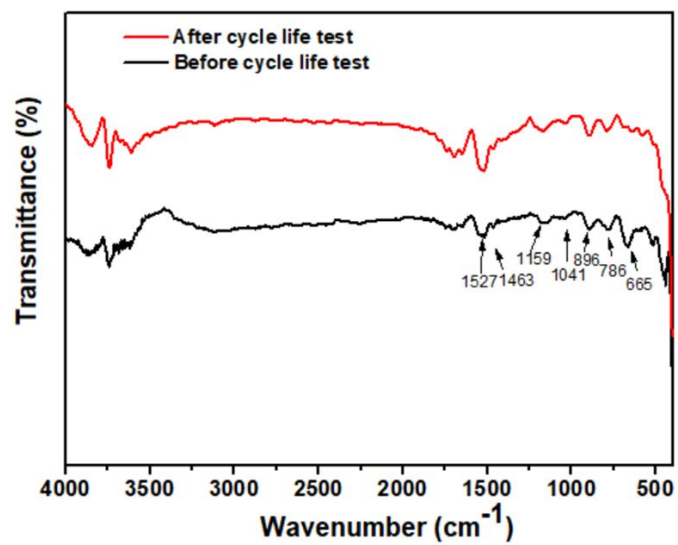

Figure S13. FTIR spectra of the RC/CNT/0.3FeS<sub>2</sub>/PPy-60 electrode before and after the 10,000 cycle test.

Table S1. The capacitance properties of the transition metal dichalcogenide (TMD)/conducting polymer/nano-carbon composites-based electrodes.

| Electrode                              | Electrolyte                                    | $C_A$<br>(mF/cm <sup>2</sup> ) | $C_m$<br>(F/g) | Cycling test<br>stability<br>(%) | References   |
|----------------------------------------|------------------------------------------------|--------------------------------|----------------|----------------------------------|--------------|
| RC/CNT/FeS <sub>2</sub> /PPy           | 1 M Na <sub>2</sub> SO <sub>4</sub><br>aqueous | 1280.0                         | 198.29         | 91.1<br>(10000 cycles)           | This<br>work |
| Ni <sub>3</sub> S <sub>2</sub> @Ni/CC  | 6.0 M KOH<br>aqueous                           | 2420.0                         | ---            | 91.5<br>(5000 cycles)            | [51]         |
| rGO@Ni <sub>3</sub> S <sub>2</sub> /CC | 6.0 M KOH<br>aqueous                           | ----                           | 477.37         | 88.0<br>(5000 cycles)            | [52]         |
| PPy/CuS/BC                             | 2.0 M NaCl<br>aqueous                          | ----                           | 580.00         | 73.0<br>(300 cycles)             | [53]         |
| MoS <sub>2</sub> /PPy/CNFs             | ----                                           | 734.0                          | ---            | 84.0<br>(after 2000<br>cycles)   | [54]         |
| PPy/MoS <sub>2</sub> /CC               | 5 M LiCl<br>aqueous                            | 1150.4                         | ---            | 87.2%<br>(5000 Cycles)           | [55]         |
